# Supplementary material for: CS in Uruguay From 2008 to 2018: Country Analysis Based on the Robson Classification
Source: Research Square preprint supplement (doi:10.21203/rs.3.rs-820236/v1), 2021-09-28
Supplement: Supplementary file 1 [file 5810770a4b16682cfb136829.xls]

## Sheet: Hoja1
Table 2. C-section by Robson group and by year in Uruguay
Robson Group		Number of Cesarean Sections (N and %)											P value
		2008	2009	2010	2011	2012	2013	2014	2015	2016	2017	2018
1	Nulliparous, single cephalic, >=37 weeks, in spontaneous labour	2933 (21.1)	2349 (24.2)	2295 (26.3)	2380 (28.2)	2885 (30.5)	3068 (32)	2913 (30.8)	2667 (28.7)	2389 (28)	2158 (28.4)	1918 (28.3)	0.061
2A	Nulliparous, single cephalic, >=37 weeks, induced labour	1149 (43.5)	1337 (49.3)	1523 (52.4)	1652 (52.2)	1832 (55.3)	2001 (55.6)	2070 (55.6)	2009 (52.9)	1930 (51.1)	1841 (53.0)	1744 (52.6)	0.113
2B	Nulliparous, single cephalic, >=37 weeks, CS before labour	1458 (97.9)	1193 (97.5)	1288 (97.1)	1308 (97.2)	1477 (98.5)	1760 (98.2)	1803 (98.3)	1784 (98.8)	1560 (97.9)	1398 (98.2)	1405 (98.8)	0.0306*
3	Multiparous (excluding prev. CS), single cephalic, >=37 weeks, in spontaneous labour	508 (8.36)	756 (8.18)	887 (8.70)	955 (9.56)	1109 (10.0)	1189 (10.6)	1239 (11.0)	1206 (10.7)	1167 (10.5)	1041 (10.3)	1038 (11.1)	0.000292*
4A	Multiparous without a previous uterine scar, with single cephalic pregnancy, >=37 weeks, induced labour	271 (22.7)	405 (20.8)	580 (25.4)	667 (24.9)	735 (26.3)	833 (28.3)	827 (26.8)	881 (25.9)	907 (26.3)	873 (26.3)	886 (26.9)	0.0182*
4B	Multiparous without a previous uterine scar, with single cephalic pregnancy, >=37 weeks, CS before labour	397 (95.4)	714 (95.9)	899 (95.7)	1002 (96.0)	1114 (95.7)	1389 (97.0)	1322 (96.4)	1450 (97.9)	1241 (96.5)	1210 (96.6)	1160 (97.9)	0.0046*
5	Previous CS, single cephalic, >=37 weeks	2475 (74.3)	3790 (74.7)	4225 (75.8)	4506 (77.4)	5076 (78.3)	5447 (79.4)	5807 (80.0)	5948 (78.2)	5860 (76.7)	5688 (78.7)	5410 (78.1)	0.0294*
6	All nulliparous breeches	663 (90.0)	537 (95.2)	517 (96.6)	521 (94.8)	546 (95.4)	521 (94.3)	580 (94.9)	565 (96.0)	526 (95.2)	543 (94.5)	484 (94.7)	0.318
7	All multiparous breeches (including prev. CS)	380 (93.8)	602 (94.2)	655 (93.8)	670 (92.2)	756 (93.1)	681 (92.6)	698 (94.0)	696 (93.4)	729 (91.9)	684 (93.3)	638 (95.2)	0.932
8	All multiple pregnancies (including prev. CS)	792 (90.6)	825 (89.3)	848 (90.3)	1029 (94.4)	1029 (92.5)	1005 (94.4)	1077 (93.8)	1155 (96.0)	1053 (93.7)	1070 (94.8)	991 (95.5)	0.00172*
9	All abnormal lies (including prev. CS)	120 (91.6)	110 (95.6)	132 (96.3)	99 (97.0)	115 (95.8)	111 (94.8)	153 (96.8)	110 (94.0)	141 (96.5)	103 (92.7)	92 (95.8)	0.809
10	All single cephalic, <=36 weeks (including prev. CS)	1301 (39.1)	1320 (40.7)	1408 (43.0)	1437 (44.6)	1578 (44.8)	1592 (46.5)	1601 (47.1)	1540 (45.2)	1497 (43.9)	1562 (48.7)	1323 (46.7)	0.00221*
X	Unable to classify	1208 (27.8)	790 (21.8)	836 (23.3)	822 (26.6)	755 (25.9)	809 (30.8)	776 (28.2)	521 (25.4)	517 (31.9)	491 (33.7)	501 (35.7)	0.00415
* indicate significant values
