# Supplementary material for: CS in Uruguay From 2008 to 2018: Country Analysis Based on the Robson Classification
Source: Research Square preprint supplement (doi:10.21203/rs.3.rs-820236/v1), 2021-09-28
Supplement: Supplementary file 2 [file 92e5b369372472f98ac5d164.xls]

## Sheet: Table1
Table 1. Characterization of births and maternal backgrounds by year.
Year	Births (CNV)	Births (SIP)	SIP coverage	CS in CNV	CS in SIP	Rest of the country	Capital city (Montevideo)	Public Health Care sector	Private Health Care sector	Age	Previous pregnancies	BMI	Previous CS
	N	N	%	n (%)	n (%)	n (%)	n (%)	n (%)	n (%)	Mean (sd)	Mean (sd)	Mean (sd)	n (%)
Total	511846	485263	94.8064	207182 (40.48)	189872 (43.14)	219881 (45.4)	264886 (54.6)	205649 (42.4)	279118 (57.6)	26.7 (6.8)	1.2 (1.5)	24.2 (5)	84696 (20.2)
2008	47104	41849	88.8438	15729 (33.4)	12443 (29.7)	17930 (42.8)	23919 (57.2)	18237 (43.6)	23612 (56.4)	26.6 (6.7)	0.8 (1.4)	23.3 (4.6)	5883 (19)
2009	46820	42382	90.5211	16675 (35.6)	13938 (32.9)	20211 (47.7)	22171 (52.3)	20250 (47.8)	22132 (52.2)	26.5 (6.8)	1.3 (1.7)	23.4 (4.6)	6410 (19.5)
2010	46943	42902	91.3917	17866 (38.1)	15257 (35.6)	19355 (45.1)	23547 (54.9)	19223 (44.8)	23679 (55.2)	26.5 (6.8)	1.3 (1.6)	23.6 (4.7)	6712 (19.4)
2011	46712	42555	91.1008	18729 (40.1)	16226 (38.1)	18889 (44.4)	23666 (55.6)	18482 (43.4)	24073 (56.6)	26.6 (6.8)	1.3 (1.6)	23.8 (4.8)	6948 (19.5)
2012	48059	45804	95.3079	19314 (40.2)	18252 (39.8)	20590 (45.0)	25214 (55.0)	19789 (43.2)	26015 (56.8)	26.5 (6.8)	1.3 (1.6)	23.9 (4.8)	7709 (19.6)
2013	48681	47174	96.9043	20011 (41.1)	19597 (41.5)	21333 (45.2)	25841 (54.8)	19542 (41.4)	27632 (58.6)	26.4 (6.9)	1.3 (1.6)	24.2 (5)	8062 (19.9)
2014	48368	47449	98.1	21391 (44.2)	20087 (42.3)	21227 (44.7)	26219 (55.3)	19030 (40.1)	28416 (59.9)	26.6 (6.8)	1.2 (1.5)	24.4 (5)	8530 (20.2)
2015	48926	47513	97.112	21072 (43.1)	19808 (41.7)	21278 (45.3)	25742 (54.7)	18601 (39.6)	28419 (60.4)	26.7 (6.8)	1.2 (1.5)	24.6 (5.2)	8868 (20.5)
2016	47058	46089	97.9408	19843 (42.2)	19000 (41.2)	21295 (46.2)	24794 (53.8)	19103 (41.4)	26986 (58.6)	26.9 (6.7)	1.3 (1.5)	24.8 (5.3)	8993 (21)
2017	43036	42362	98.4339	18934 (43.9)	18171 (42.9)	19809 (46.8)	22553 (53.2)	17245 (40.7)	25117 (59.3)	27.2 (6.7)	1.3 (1.5)	25 (5.4)	8543 (21.4)
2018	40139	39184	97.6208	17618 (43.9)	17089 (43.6)	17964 (45.8)	21220 (54.2)	16147 (41.2)	23037 (58.8)	27.4 (6.7)	1.3 (1.4)	25.2 (5.5)	8038 (21.4)
